# Supplementary material for: Comparing the greenness and sustainability of three routes to an HIV protease inhibitor intermediate
Source: Royal Society of Chemistry journal article supplement (doi:10.1039/d1gc00986a), 2021-01-01
Supplement: d1gc00986a1.zip [file d1gc00986a1.zip]

## Sheet: One-pot procedure
ROUTE B: Main synthesis one-pot procedure
Table 1B: Route B materias table for One Pot procedure for the synthesis of bis-THF alcohol as per experimental procedure (Sevenich et al., 2017)
Step No.	Input Schematic No.	Output Schematic No.	Input Material Name	Condensed Chemical Formula	Material Category	Output Material Name	Molecular Weight (g/mol)	Density (g/ml)	Molar Equivalence	Concentration	Input Mass (g)	Input Mass (kg)	Input Volume (ml)	Input mol	Output Mass (g)	Output Mass (kg)	Output mol	Sigma-Aldrich Catalogue Price ($/unit) - February 2019	Unit	Cost per mol ($/mol)	Sigma-Aldrich Catalogue No.	CAS No.	Yield	Cost of Material ($)	Temperature (℃)	Pressure (atm)	Reaction Time (hr)
1Ba	11		Cbz-protected glycol aldehyde	C10H10O4	Advanced Starting Material		194.19		1		1.94	0.00194		0.00999022									0.349966	0.677095	25	1	36
	10		Furan	C4H4O	Reagent		68.07	0.936	4.99975	≥ 99%	3.4	0.0034	3.63248	0.0499486				61.2	500 ml	8.90146	185922-500ML	110-00-9		0.444615
			Methyl tert-butyl ether (MTBE)	C5H12O	Solvent		88.15	0.74	16.806	0.998	14.8	0.0148	20	0.167896				4100	200 L	2.44199	MX0819-30	1634-04-4		0.41
1Bb			Palladium on activated charcoal (Pd/C)	Pd-C	Catalyst		106.42		0.0199406	10% Pd	0.0212	2.12e-05		0.000199211				2	2 g	106.42	-	-		0.0212	25	1	36
			Hydrogen	H2	Reagent		2.016	8.13e-05	0.99	≥ 99,99%	0.0310322	3.10322e-05	381.7	0.00989031				243	56 L	107.601	295396-56L	1333-74-0		1.06421
1Bc			Procine Pancrease Lipase (PPL)	C11H9N3NaO2+	Bio-catalyst		238.202		0.0815232	10% w/w	0.194	0.000194		0.000814435				202	500 g	96.2336	L3126-500G	9001-62-1		0.078376	25	1	72
			Propionic anhydride (PrCO)2O	C6H10O3	Reagent		130.14	1.015	0.999903	0.99	1.3	0.0013	1.28079	0.00998924				60.4	1 L	7.74429	8006801000	123-62-6		0.0773596
			Cyclohexane (c-hexane)	C6H12	Solvent (work up)		84.16	0.779	17.99		15.1256	0.0151256	19.4166	0.179724				4120	200 L	2.22554	CX2290-30	110-82-7		0.399983
			Ethyl Acetate (EtOAc)	C4H8O2	Solvent (work up)		88.11	0.902	11.76		10.3516	0.0103516	11.4763	0.117485				3650	200 L	1.78271	319902-200L	141-78-6		0.209442
		(-)-1	Bis-THF Alcohol	C6H10O3	Target molecule	(3R,3aS,6aR)-Hexahydrofuro[2,3-b]furan-3-ol	130.14								0.455	0.000455	0.00349623
Table 2B: Route B materias table for One Pot procedure for the synthesis of 1kg bis-THF alcohol
Step No.	Input Schematic No.	Output Schematic No.	Input Material Name	Condensed Chemical Formula	Material Category	Output Material Name	Molecular Weight (g/mol)	Density (g/ml)	Molar Equivalence	Concentration	Input Mass (g)	Input Mass (kg)	Input Volume (ml)	Input mol	Output Mass (g)	Output Mass (kg)	Output mol	Sigma-Aldrich Catalogue Price ($/unit) - February 2019	Unit	Cost per mol ($/mol)	Sigma-Aldrich Catalogue No.	CAS No.	Yield	Cost of Material ($)	Temperature (℃)	Pressure (atm)	Reaction Time (hr)
1Ba	11		Cbz-protected glycol aldehyde	C10H10O4	Advanced Starting Material		194.19		1		4263.32	4.26332		21.9544									0.35	1446.97	25	1	36
	10		Furan	C4H4O	Reagent		68.07	0.936	4.99975	≥ 99%	7471.8	7.4718	7982.69	109.766				61.2	500 ml	8.90146	185922-500ML	110-00-9		977.081
			Methyl tert-butyl ether (MTBE)	C5H12O	Solvent		88.15	0.74	16.806	0.998	32524.3	32.5243	43951.8	368.965				4100	200 L	2.44199	MX0819-30	1634-04-4		901.011
1Bb			Palladium on activated charcoal (Pd/C)	Pd-C	Catalyst		106.42		0.0199406	10% Pd	46.5889	0.0465889		0.437783				2	2 g	106.42	-	-		46.5889	25	1	36
			Hydrogen	H2	Reagent		2.016	8.13e-05	0.99	≥ 99,99%	43.8174	0.0438174	538960	21.7348				243	56 L	107.601	295396-56L	1333-74-0		2338.7
1Bc			Procine Pancrease Lipase (PPL)	C11H9N3NaO2+	Bio-catalyst		238.202		0.0815232	10% w/w	426.332	0.426332		1.78979				202	500 g	96.2336	L3126-500G	9001-62-1		172.238	25	1	72
			Propionic anhydride (PrCO)2O	C6H10O3	Reagent		130.14	1.015	0.999903	0.99	2856.86	2.85686	2814.64	21.9522				60.4	1 L	7.74429	8006801000	123-62-6		170.005
			Cyclohexane (c-hexane)	C6H12	Solvent (work up)		84.16	0.779	17.99		33239.8	33.2398	42669.8	394.959				4120	200 L	2.22554	CX2290-30	110-82-7		878.998
			Ethyl Acetate (EtOAc)	C4H8O2	Solvent (work up)		88.11	0.902	11.76		22748.5	22.7485	25220.1	258.183				3650	200 L	1.78271	319902-200L	141-78-6		460.267
		(-)-1	Bis-THF Alcohol	C6H10O3	Target Molecule	(3R,3aS,6aR)-Hexahydrofuro[2,3-b]furan-3-ol	130.14								1000	1	7.68403
																							Total	717.303			144
Table 3B: Summation of chemical materials per category per synthesis step for the production of 1kg Cbz-protected glycol
Step No.:	Material Category	Material Accumulated (kg)	Step Product (kg)
1Ba-c	Advanced Starting Material	4.26332
	Solvent	88.5126
	Reagent	10.3725
	Water	0
	Target molecule	-	1

## Sheet: One-pot E-factor
ROUTE B: E-Factor main synthesis one-pot procedure
Table 4B: Simple, complete and traditional E-Factor calculations for route B synthesis to 1kg bis-THF alcohol
Step No.	Starting Material (kg)	Solvents (kg)	Reagents (kg)	Water (kg)	Step Product (kg)	Step sE-factor (kg/kg)	sE-Factor Contribution to Process (kg/kg)	Step cE-Factor (kg/kg)	cE-Factor Contribution to Process (kg/kg)	E-Factor Contribution to Process (kg/kg)	Process Mass Intensity (PMI) (kg/kg)	Process Complexity
1Ba-c	4.26332	88.5126	10.3725	0	1	13.6358	13.6358	102.148	102.148	22.4871	103.148	3
Total	4.26332	88.5126	10.3725	0	1	13.6358	13.6358	102.148	102.148	22.4871	103.148	3
Table 5B: Total material mass per category for route B one-pot procedure
Starting Material (kg)	Solvents (kg)	Reagents (kg)	Water (kg)
4.26332	88.5126	10.3725	0

## Sheet: Advanced Starting Material
ROUTE B: Sub-synthesis advanced strating material (ASM)
Table 6B: Chemical material quantities, cost and operating conditions per synthesis step to produce Cbz-protected aldehyde as per constructed experimental procedure (Sevenich et al., 2017) - Masses between synthesis step balance
Step No.	Input Schematic No.	Output Schematic No.	Input Material Name	Condensed Chemical Formula	Material Category	Output Material Name	Molecular Weight (g/mol)	Density (g/ml)	Molar Equivalence	Concentration	Input Mass (g)	Input Mass (kg)	Input Volume (ml)	Input mol	Output Mass (g)	Output Mass (kg)	Output mol	Sigma-Aldrich Catalogue Price ($/unit) - February 2019	Unit	Cost per mol ($/mol)	Sigma-Aldrich Catalogue No.	CAS No.	Yield	Cost of Material ($)	Temperature (℃)	Pressure (atm)	Reaction Time (hr)
1b	15		Glycerol	C3H8O3	Starting Material		92.09	1.25	9.96627		18.4	0.0184	14.72	0.199805				5000	200 L	1.8418	G7893 - 200L	56-81-5	1	0.368	0 - 25	1	15
			Benzyl Chloroformate (CbzCl)	C8H7ClO2	Reagent		170.59	1.21	1		3.42	0.00342	2.82645	0.0200481				157	250 ml	88.5376	8146880250	501-53-1		1.77501
			Pyridine (Py)	C5H5N	Reagent		79.1	0.978	1.09724		1.74	0.00174	1.77914	0.0219975				879	8 L	8.88662	270970-4X2L	110-86-1		0.195483
			Ethyl Acetate (EtOAc)	C4H8O2	Solvent		88.11	0.902	41.09		72.5828	0.0725828	80.4688	0.823775				770	18 L	4.17866	270989-18L	141-78-6		3.44227
		16		C11H14O5	Intermediate (external)	Cbz-protected glycol	226.23								4.53547	0.00453547	0.0200481
2b																							0.67		0 - 25	1	15
		16	Cbz-protected glycol	C11H14O5	Intermediate (external)		226.23		1		3.92	0.00392		0.0199835
			Methanol (MeOH)	CH4O	Solvent		32.04	0.791	100.694		64.4717	0.0644717	81.5065	2.01222				491.177	20 L	0.994773	179337-20L	67-56-1		2.00171
			Sodium Periodate	NaIO4	Reagent		213.89	3.86	1.50201		6.42	0.00642	1.66321	0.0300154				1970	2,5 L	43.6646	311448-2.5L	7790-28-5		1.31061
		11		C10H10O4	Advanced Starting Material	Cbz-protected glycol aldehyde	194.19								2.6	0.0026	0.0133889								distillation at 105		distillation at 1
Table 7B: Chemical material quantities, cost and operating conditions per synthesis step to produce 1kg of Cbz-protected aldehyde - Masses between synthesis step balance
Step No.	Input Schematic No.	Output Schematic No.	Input Material Name	Condensed Chemical Formula	Material Category	Output Material Name	Molecular Weight (g/mol)	Density (g/ml)	Molar Equivalence	Concentration	Input Mass (g)	Input Mass (kg)	Input Volume (ml)	Input mol	Output Mass (g)	Output Mass (kg)	Output mol	Sigma-Aldrich Catalogue Price ($/unit) - February 2019	Unit	Cost per mol ($/mol)	Sigma-Aldrich Catalogue No.	CAS No.	Yield	Cost of Material ($)	Temperature (℃)	Pressure (atm)	Reaction Time (hr)
1b	15		Glycerol	C3H8O3	Starting Material		92.09	1.25	9.96627		7054.13	7.05413	5643.31	76.6004				5000	200 L	1.8418	G7893 - 200L	56-81-5	1	141.083	0 - 25	1	15
			Benzyl Chloroformate (CbzCl)	C8H7ClO2	Reagent		170.59	1.21	1		1311.15	1.31115	1083.59	7.68596				157	250 ml	88.5376	8146880250	501-53-1		680.497
			Pyridine (Py)	C5H5N	Reagent		79.1	0.978	1.09724		667.076	0.667076	682.081	8.43332				879	8 L	8.88662	270970-4X2L	110-86-1		74.9437
			Ethyl Acetate (EtOAc)	C4H8O2	Solvent		88.11	0.902	41.09		27826.6	27.8266	30849.9	315.816				770	18 L	4.17866	270989-18L	141-78-6		1319.69
		16		C11H14O5	Intermediate (external)	Cbz-protected glycol	226.23								1738.8	1.7388	7.68596
2b																							0.67		0 - 25	1	15
		16	Cbz-protected glycol	C11H14O5	Intermediate (external)		226.23		1		1738.8	1.7388		7.68596
			Methanol (MeOH)	CH4O	Solvent		32.04	0.791	100.694		24796.8	24.7968	31348.7	773.933				491.177	20 L	0.994773	179337-20L	67-56-1		769.887
			Sodium Periodate	NaIO4	Reagent		213.89	3.86	1.50201		2469.23	2.46923	639.697	11.5444				1970	2,5 L	43.6646	311448-2.5L	7790-28-5		504.081
		11		C10H10O4	Advanced Starting Material	Cbz-protected glycol aldehyde	194.19								1000	1	5.1496								distillation at 105		distillation at 1
																						Overall yield	0.67	349.018
Table 8B: Summation of chemical materials per category per synthesis step for the production of 1kg Cbz-protected glycol
Step No.:	Material Category	Material Accumulated (kg)	Step Product (kg)
1b	Starting Material	7.05413
	Solvent	27.8266
	Reagent	1.97822
	Water	0
	Intermediate (external)	-	1.7388
2b	Intermediate (external)	1.7388
	Solvent	24.7968
	Reagent	2.46923
	Water	0
	Advanced Strating Material	-	1
Table 9B: Chemical material quantities, cost and operating conditions per synthesis step to produce 4,15kg of Cbz-protected aldehyde - Masses between synthesis step balance
Step No.	Input Schematic No.	Output Schematic No.	Input Material Name	Condensed Chemical Formula	Material Category	Output Material Name	Molecular Weight (g/mol)	Density (g/ml)	Molar Equivalence	Concentration	Input Mass (g)	Input Mass (kg)	Input Volume (ml)	Input mol	Output Mass (g)	Output Mass (kg)	Output mol	Sigma-Aldrich Catalogue Price ($/unit) - February 2019	Unit	Cost per mol ($/mol)	Sigma-Aldrich Catalogue No.	CAS No.	Yield	Cost of Material ($)	Temperature (℃)	Pressure (atm)	Reaction Time (hr)
1b	15		Glycerol	C3H8O3	Starting Material		92.09	1.25	9.96627		29245.3	29.2453	23396.2	317.573				5000	200 L	1.8418	G7893 - 200L	56-81-5	1	584.906	0 - 25	1	15
			Benzyl Chloroformate (CbzCl)	C8H7ClO2	Reagent		170.59	1.21	1		5435.81	5.43581	4492.4	31.8647				157	250 ml	88.5376	8146880250	501-53-1		2821.23
			Pyridine (Py)	C5H5N	Reagent		79.1	0.978	1.09724		2765.59	2.76559	2827.8	34.9632				879	8 L	8.88662	270970-4X2L	110-86-1		310.704
			Ethyl Acetate (EtOAc)	C4H8O2	Solvent		88.11	0.902	41.09		115364	115.364	127898	1309.32				770	18 L	4.17866	270989-18L	141-78-6		5471.21
		16		C11H14O5	Intermediate (external)	Cbz-protected glycol	226.23								7208.76	7.20876	31.8647
2b																							0.67		0 - 25	1	15
		16	Cbz-protected glycol	C11H14O5	Intermediate (external)		226.23		1		7208.76	7.20876		31.8647
			Methanol (MeOH)	CH4O	Solvent		32.04	0.791	100.694		102803	102.803	129966	3208.6				491.177	20 L	0.994773	179337-20L	67-56-1		3191.83
			Sodium Periodate	NaIO4	Reagent		213.89	3.86	1.50201		10237	10.237	2652.08	47.8612				1970	2,5 L	43.6646	311448-2.5L	7790-28-5		2089.84
		11		C10H10O4	Advanced Starting Material	Cbz-protected aldehyde	194.19								4145.84	4.14584	21.3494								distillation at 105		distillation at 1
																							Total	1446.97
Table 10B: Chemical material quantities, cost and operating conditions per synthesis step to produce 1,94kg of Cbz-protected aldehyde - Masses between synthesis step balance
Step No.	Input Schematic No.	Output Schematic No.	Input Material Name	Condensed Chemical Formula	Material Category	Output Material Name	Molecular Weight (g/mol)	Density (g/ml)	Molar Equivalence	Concentration	Input Mass (g)	Input Mass (kg)	Input Volume (ml)	Input mol	Output Mass (g)	Output Mass (kg)	Output mol	Sigma-Aldrich Catalogue Price ($/unit) - February 2019	Unit	Cost per mol ($/mol)	Sigma-Aldrich Catalogue No.	CAS No.	Yield	Cost of Material ($)	Temperature (℃)	Pressure (atm)	Reaction Time (hr)
1b	15		Glycerol	C3H8O3	Starting Material		92.09	1.25	9.96627		13.685	0.013685	10.948	0.148605				5000	200 L	1.8418	G7893 - 200L	56-81-5	1	0.2737	0 - 25	1	15
			Benzyl Chloroformate (CbzCl)	C8H7ClO2	Reagent		170.59	1.21	1		2.54363	0.00254363	2.10217	0.0149108				157	250 ml	88.5376	8146880250	501-53-1		1.32016
			Pyridine (Py)	C5H5N	Reagent		79.1	0.978	1.09724		1.29413	0.00129413	1.32324	0.0163606				879	8 L	8.88662	270970-4X2L	110-86-1		0.145391
			Ethyl Acetate (EtOAc)	C4H8O2	Solvent		88.11	0.902	41.09		53.9835	0.0539835	59.8487	0.612684				770	18 L	4.17866	270989-18L	141-78-6		2.5602
		16		C11H14O5	Intermediate (external)	Cbz-protected glycol	226.23								3.37326	0.00337326	0.0149108
2b																							0.67		0 - 25	1	15
		16	Cbz-protected glycol	C11H14O5	Intermediate (external)		226.23		1		3.37326	0.00337326		0.0149108
			Methanol (MeOH)	CH4O	Solvent		32.04	0.791	100.694		48.1058	0.0481058	60.8164	1.50143				491.177	20 L	0.994773	179337-20L	67-56-1		1.49358
			Sodium Periodate	NaIO4	Reagent		213.89	3.86	1.50201		4.79031	0.00479031	1.24101	0.0223961				1970	2,5 L	43.6646	311448-2.5L	7790-28-5		0.977918
		11		C10H10O4	Advanced Starting Material	Cbz-protected aldehyde	194.19								1.94	0.00194	0.00999022								distillation at 105		distillation at 1
																							Total	0.677095
Table 11B: Chemical material quantities, cost and operating conditions per synthesis step to produce 0,194kg of Cbz-protected aldehyde - Masses between synthesis step balance
Step No.	Input Schematic No.	Output Schematic No.	Input Material Name	Condensed Chemical Formula	Material Category	Output Material Name	Molecular Weight (g/mol)	Density (g/ml)	Molar Equivalence	Concentration	Input Mass (g)	Input Mass (kg)	Input Volume (ml)	Input mol	Output Mass (g)	Output Mass (kg)	Output mol	Sigma-Aldrich Catalogue Price ($/unit) - February 2019	Unit	Cost per mol ($/mol)	Sigma-Aldrich Catalogue No.	CAS No.	Yield	Cost of Material ($)	Temperature (℃)	Pressure (atm)	Reaction Time (hr)
1b	15		Glycerol	C3H8O3	Starting Material		92.09	1.25	9.96627		1.3685	0.0013685	1.0948	0.0148605				5000	200 L	1.8418	G7893 - 200L	56-81-5	1	0.02737	0 - 25	1	15
			Benzyl Chloroformate (CbzCl)	C8H7ClO2	Reagent		170.59	1.21	1		0.254363	0.000254363	0.210217	0.00149108				157	250 ml	88.5376	8146880250	501-53-1		0.132016
			Pyridine (Py)	C5H5N	Reagent		79.1	0.978	1.09724		0.129413	0.000129413	0.132324	0.00163606				879	8 L	8.88662	270970-4X2L	110-86-1		0.0145391
			Ethyl Acetate (EtOAc)	C4H8O2	Solvent		88.11	0.902	41.09		5.39835	0.00539835	5.98487	0.0612684				770	18 L	4.17866	270989-18L	141-78-6		0.25602
		16		C11H14O5	Intermediate (external)	Cbz-protected glycol	226.23								0.337326	0.000337326	0.00149108
2b																							0.67		0 - 25	1	15
		16	Cbz-protected glycol	C11H14O5	Intermediate (external)		226.23		1		0.337326	0.000337326		0.00149108
			Methanol (MeOH)	CH4O	Solvent		32.04	0.791	100.694		4.81058	0.00481058	6.08164	0.150143				491.177	20 L	0.994773	179337-20L	67-56-1		0.149358
			Sodium Periodate	NaIO4	Reagent		213.89	3.86	1.50201		0.479031	0.000479031	0.124101	0.00223961				1970	2,5 L	43.6646	311448-2.5L	7790-28-5		0.0977918
		11		C10H10O4	Advanced Starting Material	Cbz-protected aldehyde	194.19								0.194	0.000194	0.000999022								distillation at 105		distillation at 1
																							Total	0.0677095

## Sheet: ASM E-factor
ROUTE B: E-Factor sub-synthesis advanced starting material (ASM)
Table 12B: Simple, complete and traditional E-Factor calculations for route B synthesis to 1kg Cbz-protected aldehyde
Step No.	Starting Material/ Intermediate (external) (kg)	Solvents (kg)	Reagents (kg)	Water (kg)	Product (kg)	Step sE-factor (kg/kg)	sE-Factor Contribution to Process (kg/kg)	Step cE-Factor (kg/kg)	cE-Factor Contribution to Process (kg/kg)	E-Factor Contribution to Process (kg/kg)	Process Mass Intensity (PMI) (kg/kg)	Process Complexity
1b	7.05413	27.8266	1.97822	0	1.7388	4.19461	7.29356	20.198	35.1201	10.0762	36.1201	0
2b	1.7388	24.7968	2.46923	0	1	3.20803	3.20803	28.0048	28.0048	5.68771	29.0048	1
Total	7.05413	52.6234	4.44745	0	1		10.5016		63.125	15.7639	64.125	1
Table 13B: Conversion from Intrinsic E-Factor to E-factor contributions to Cbz-Protected aldehyde (2b)				Table 14B: Conversion from Intrinsic E-Factor to E-factor contributions to Cbz-Protected aldehyde (2b)
sEF	cEF	E-factor		sEF	cEF	E-factor
Contribution to compound 2b sub-process (kg/kg)				Contribution to compound 2b sub-process (kg/kg)
10.5016	63.125	15.7639		10.5016	63.125	15.7639
x Quantity required to produce 1kg of bis-THF alcohol (kg)				x Quantity required to produce 1kg of bis-THF alcohol (kg)
4.263				4.146
Contribution to Route B One-Pot synthesis to bis-THF alcohol (kg/kg)				Contribution to Route B step-by-step synthesis to bis-THF alcohol (kg/kg)
44.7683	269.102	67.2016		43.5396	261.716	65.3572
Table 15B: Total amount of material categories for route B sub-synthesis
Starting Material (kg)	Solvents (kg)	Reagents (kg)	Water (kg)
7.05413	52.6234	4.44745	0
29.2464	218.176	18.4391	0	x 4.146 to make 1kg Bis-THF (the percentage contribution will remain the same)

## Sheet: One-pot Cummulative E-factor
ROUTE B: Cummulative E-Factor one -pot procedure and sub-synthesis advanced starting material (ASM)
One-pot procedure route B E-Factors				Advanced Starting Material route B E-Factors
Table 16B: Summary of E-factor values calculated for main route B (starting from compound 2b)				Table 17B: Summary of E-factor values calculated for one-pot advanced starting material route B
sEF (kg/kg)	cEF (kg/kg)	E-factor (kg/kg)		sEF (kg/kg)	cEF (kg/kg)	E-factor (kg/kg)
13.6358	102.148	22.4871		44.7683	269.102	67.2016
		Table 18B: Green Score card input data
		sEF, cEF and E-Factor summary for route B sub and one-pot synthesis
		sEF (kg/kg)	cEF (kg/kg)	E-factor (kg/kg)
		58.4041	371.25	89.6887
		Complexity = Construction steps
		3
Table 19B: Total amount of material categories for route B one-pot procedure and sub-synthesis
Starting Material (kg)	Solvents (kg)	Reagents (kg)	Water (kg)
33.5098	306.689	28.8116	0

## Sheet: Step-by-step procedure
(
Table 20B: Route B materias table for step-by-step procedure for the synthesis of bis-THF alcohol as per experimental procedure (Sevenich et al., 2017) - Masses between synthesis steps do not balance
Step No.	Input Schematic No.	Output Schematic No.	Input Material Name	Condensed Chemical Formula	Material Category	Output Material Name	Molecular Weight (g/mol)	Density (g/ml)	Molar Equivalence	Concentration	Input Mass (g)	Input Mass (kg)	Input Volume (ml)	Input mol	Output Mass (g)	Output Mass (kg)	Output mol	Sigma-Aldrich Catalogue Price ($/unit) - February 2019	Unit	Cost per mol ($/mol)	Sigma-Aldrich Catalogue No.	CAS No.	Yield	Cost of Material ($)	Temperature (℃)	Pressure (atm)	Reaction Time (hr)
1B	11		Cbz-protected glycol aldehyde	C10H10O4	Advanced Starting Material		194.19		1		0.194	0.000194		0.000999022									0.931286	0.0677095	25	1	20
	10		Furan	C4H4O	Reagent		68.07	0.936	4.99975	≥ 99%	0.34	0.00034	0.363248	0.00499486				61.2	500 ml	8.90146	185922-500ML	110-00-9		0.0444615
			Methyl tert-butyl ether (MTBE)	C5H12O	Solvent		88.15	0.74	42.015	0.998	3.7	0.0037	5	0.0419739				4100	200 L	2.44199	MX0819-30	1634-04-4		0.1025
			Cyclohexane (c-hexane)	C6H12	Solvent (work up)		84.16	0.779	17.99		1.51256	0.00151256	1.94166	0.0179724				4120	200 L	2.22554	CX2290-30	110-82-7		0.0399983
			Ethyl Acetate (EtOAc)	C4H8O2	Solvent (work up)		88.11	0.902	11.76		1.03516	0.00103516	1.14763	0.0117485				3650	200 L	1.78271	319902-200L	141-78-6		0.0209442
		rac-12		C14H14O5	Intermediate (external)	exo-2,7-Dioxabicyclo [3.2.0] hept-3-en-6-ylmethyl Benzyl Carbonate	262.26								0.244	0.000244	0.000930374
2Ba																							0.899924		25	1	24
	rac-12			C14H14O5	Intermediate (external)	exo-2,7-Dioxabicyclo [3.2.0] hept-3-en-6-ylmethyl Benzyl Carbonate	262.26				0.262	0.000262		0.000999009
			Methyl tert-butyl ether (MTBE)	C5H12O	Solvent		88.15	0.74	84.0311	0.998	7.4	0.0074	10	0.0839478				4100	200 L	2.44199	MX0819-30	1634-04-4		0.205
			Hydrogen	H2	Reagent		2.016	0.0004045	0.993048	≥ 99,99%	0.002	2e-06	4.94438	0.000992063				243	56 L	21.6267	295396-56L	1333-74-0		0.0214551
2Bb		rac-13	Palladium on activated charcoal (Pd/C)	Pd-C	Catalyst		106.42		0.0199408	10% Pd	0.00212	2.12e-06		1.99211e-05				2	2g	106.42	-	-		0.00212
			Cyclohexane (c-hexane)	C6H12	Solvent (work up)		84.16	0.779	17.9902		1.51256	0.00151256	1.94166	0.0179724				4120	200 L	2.22554	CX2290-30	110-82-7		0.0399983
			Ethyl Acetate (EtOAc)	C4H8O2	Solvent (work up)		88.11	0.902	11.7602		1.03516	0.00103516	1.14763	0.0117485				3650	200 L	1.78271	319902-200L	141-78-6		0.0209442
		rac-1		C6H10O3	Intermediate (external)	anti-Hexahydrofuro[2,3-b]furan-3-ol	130.14								0.117	0.000117	0.000899032
3B																							0.43		25	1	22
	rac-1		anti-Hexahydrofuro[2,3-b]furan-3-ol	C6H10O3	Intermediate (external)		130.14		1		0.13	0.00013		0.000998924
			Methyl tert-butyl ether (MTBE)	C5H12O	Solvent		88.15	0.74	84.0382	0.998	7.4	0.0074	10	0.0839478				4100	200 L	2.44199	MX0819-30	1634-04-4		0.205
			Procine Pancrease Lipase (PPL)	C11H9N3NaO2+	Bio-catalyst		238.202		0.0546343	10% w/w	0.013	1.3e-05		5.45755e-05				202	500 g	96.2336	L3126-500G	9001-62-1		0.005252
			Propionic anhydride (PrCO)2O	C6H10O3	Reagent		130.14	1.015	1	0.99	0.13	0.00013	0.128079	0.000998924				60.4	1 L	7.74429	8006801000	123-62-6		0.00773596
			Cyclohexane (c-hexane)	C6H12	Solvent (work up)		84.16	0.779	17.9918		1.51256	0.00151256	1.94166	0.0179724				4120	200 L	2.22554	CX2290-30	110-82-7		0.0399983
			Ethyl Acetate (EtOAc)	C4H8O2	Solvent (work up)		88.11	0.902	11.7611		1.03516	0.00103516	1.14763	0.0117485				3650	200 L	1.78271	319902-200L	141-78-6		0.0209442
		(-)-1	Bis-THF Alcohol	C6H10O3	Target molecule	(3R,3aS,6aR)-Hexahydrofuro[2,3-b]furan-3-ol	130.143			0.99					0.0559013	5.59013e-05	0.000429537
Table 21B: Route B materias table for step-by-step procedure for the synthesis of 0,056g bis-THF alcohol - Masses between synthesis steps balance
Step No.	Input Schematic No.	Output Schematic No.	Input Material Name	Condensed Chemical Formula	Material Category	Output Material Name	Molecular Weight (g/mol)	Density (g/ml)	Molar Equivalence	Concentration	Input Mass (g)	Input Mass (kg)	Input Volume (ml)	Input mol	Output Mass (g)	Output Mass (kg)	Output mol	Sigma-Aldrich Catalogue Price ($/unit) - February 2019	Unit	Cost per mol ($/mol)	Sigma-Aldrich Catalogue No.	CAS No.	Yield	Cost of Material ($)	Temperature (℃)	Pressure (atm)	Reaction Time (hr)
1B	11		Cbz-protected glycol aldehyde	C10H10O4	Advanced Starting Material		194.19		1		0.231758	0.000231758		0.00119346									0.93	0	25	1	20
	10		Furan	C4H4O	Reagent		68.07	0.936	4.99975	≥ 99%	0.406173	0.000406173	0.433946	0.00596699				61.2	500 ml	8.90146	185922-500ML	110-00-9		0.0531149
			Methyl tert-butyl ether (MTBE)	C5H12O	Solvent		88.15	0.74	42.015	0.998	4.42012	0.00442012	5.97313	0.0501432				4100	200 L	2.44199	MX0819-30	1634-04-4		0.122449
			Cyclohexane (c-hexane)	C6H12	Solvent (work up)		84.16	0.779	17.99		1.80694	0.00180694	2.31956	0.0214703				4120	200 L	2.22554	CX2290-30	110-82-7		0.047783
			Ethyl Acetate (EtOAc)	C4H8O2	Solvent (work up)		88.11	0.902	11.76		1.23663	0.00123663	1.37099	0.0140351				3650	200 L	1.78271	319902-200L	141-78-6		0.0250205
		rac-12		C14H14O5	Intermediate (external)	exo-2,7-Dioxabicyclo [3.2.0] hept-3-en-6-ylmethyl Benzyl Carbonate	262.26								0.291087	0.000291087	0.00110992
2Ba																							0.9		25	1	24
	rac-12			C14H14O5	Intermediate (external)	exo-2,7-Dioxabicyclo [3.2.0] hept-3-en-6-ylmethyl Benzyl Carbonate	262.26				0.291087	0.000291087		0.00110992
			Methyl tert-butyl ether (MTBE)	C5H12O	Solvent		88.15	0.74	84.0311	0.998	8.22153	0.00822153	11.1102	0.0932675				4100	200 L	2.44199	MX0819-30	1634-04-4		0.227759
			Hydrogen	H2	Reagent		2.016	0.0004045	0.993048	≥ 99,99%	0.00222203	2.22203e-06	5.49329	0.0011022				243	56 L	21.6267	295396-56L	1333-74-0		0.0238369
2Bb		rac-13	Palladium on activated charcoal (Pd/C)	Pd-C	Catalyst		106.42		0.0199408	10% Pd	0.00235536	2.35536e-06		2.21326e-05				2	2 g	106.42	-	-		0.00235536
			Cyclohexane (c-hexane)	C6H12	Solvent (work up)		84.16	0.779	17.9902		1.68048	0.00168048	2.15722	0.0199676				4120	200 L	2.22554	CX2290-30	110-82-7		0.0444388
			Ethyl Acetate (EtOAc)	C4H8O2	Solvent (work up)		88.11	0.902	11.7602		1.15008	0.00115008	1.27503	0.0130528				3650	200 L	1.78271	319902-200L	141-78-6		0.0232694
		rac-1		C6H10O3	Intermediate (external)	anti-Hexahydrofuro[2,3-b]furan-3-ol	130.14								0.13	0.00013	0.000998924
3B																							0.43		25	1	22
	rac-1		anti-Hexahydrofuro[2,3-b]furan-3-ol	C6H10O3	Intermediate (external)		130.14		1		0.13	0.00013		0.000998924
			Methyl tert-butyl ether (MTBE)	C5H12O	Solvent		88.15	0.74	84.0382	0.998	7.4	0.0074	10	0.0839478				4100	200 L	2.44199	MX0819-30	1634-04-4		0.205
			Procine Pancrease Lipase (PPL)	C11H9N3NaO2+	Bio-catalyst		238.202		0.0546343	10% w/w	0.013	1.3e-05		5.45755e-05				202	500 g	96.2336	L3126-500G	9001-62-1		0.005252
			Propionic anhydride (PrCO)2O	C6H10O3	Reagent		130.14	1.015	1	0.99	0.13	0.00013	0.128079	0.000998924				60.4	1 L	7.74429	8006801000	123-62-6		0.00773596
			Cyclohexane (c-hexane)	C6H12	Solvent (work up)		84.16	0.779	17.9918		1.51256	0.00151256	1.94166	0.0179724				4120	200 L	2.22554	CX2290-30	110-82-7		0.0399983
			Ethyl Acetate (EtOAc)	C4H8O2	Solvent (work up)		88.11	0.902	11.7611		1.03516	0.00103516	1.14763	0.0117485				3650	200 L	1.78271	319902-200L	141-78-6		0.0209442
		(-)-1	Bis-THF Alcohol	C6H10O3	Target molecule	(3R,3aS,6aR)-Hexahydrofuro[2,3-b]furan-3-ol	130.143			0.99					0.0559013	5.59013e-05	0.000429537
Table 22B: Route B materias table for step-by-step procedure for the synthesis of 1kg bis-THF alcohol - Masses between synthesis steps balance
Step No.	Input Schematic No.	Output Schematic No.	Input Material Name	Condensed Chemical Formula	Material Category	Output Material Name	Molecular Weight (g/mol)	Density (g/ml)	Molar Equivalence	Concentration	Input Mass (g)	Input Mass (kg)	Input Volume (ml)	Input mol	Output Mass (g)	Output Mass (kg)	Output mol	Sigma-Aldrich Catalogue Price ($/unit) - February 2019	Unit	Cost per mol ($/mol)	Sigma-Aldrich Catalogue No.	CAS No.	Yield	Cost of Material ($)	Temperature (℃)	Pressure (atm)	Reaction Time (hr)
1B	11		Cbz-protected glycol aldehyde	C10H10O4	Advanced Starting Material		194.19		1		4145.84	4.14584		21.3494									0.93	1446.97	25	1	20
	10		Furan	C4H4O	Reagent		68.07	0.936	4.99975	≥ 99%	7265.9	7.2659	7762.71	106.742				61.2	500 ml	8.90146	185922-500ML	110-00-9		950.156
			Methyl tert-butyl ether (MTBE)	C5H12O	Solvent		88.15	0.74	42.015	0.998	79070.1	79.0701	106851	896.995				4100	200 L	2.44199	MX0819-30	1634-04-4		2190.45
			Cyclohexane (c-hexane)	C6H12	Solvent (work up)		84.16	0.779	17.99		32323.8	32.3238	41493.9	384.075				4120	200 L	2.22554	CX2290-30	110-82-7		854.775
			Ethyl Acetate (EtOAc)	C4H8O2	Solvent (work up)		88.11	0.902	11.76		22121.7	22.1217	24525.1	251.069				3650	200 L	1.78271	319902-200L	141-78-6		447.584
		rac-12		C14H14O5	Intermediate (external)	exo-2,7-Dioxabicyclo [3.2.0] hept-3-en-6-ylmethyl Benzyl Carbonate	262.26								5207.15	5.20715	19.8549
2Ba																							0.9		25	1	24
	rac-12			C14H14O5	Intermediate (external)	exo-2,7-Dioxabicyclo [3.2.0] hept-3-en-6-ylmethyl Benzyl Carbonate	262.26				5207.15	5.20715		19.8549
			Methyl tert-butyl ether (MTBE)	C5H12O	Solvent		88.15	0.74	84.0311	0.998	147072	147.072	198746	1668.43				4100	200 L	2.44199	MX0819-30	1634-04-4		4074.3
			Hydrogen	H2	Reagent		2.016	0.0004045	0.993048	≥ 99,99%	39.7493	0.0397493	98267.6	19.7169				243	56 L	21.6267	295396-56L	1333-74-0		426.411
2Bb		rac-13	Palladium on activated charcoal (Pd/C)	Pd-C	Catalyst		106.42		0.0199408	10% Pd	42.1342	0.0421342		0.395924				2	2g	106.42	-	-		42.1342
			Cyclohexane (c-hexane)	C6H12	Solvent (work up)		84.16	0.779	17.9902		30061.5	30.0615	38589.9	357.195				4120	200 L	2.22554	CX2290-30	110-82-7		794.951
			Ethyl Acetate (EtOAc)	C4H8O2	Solvent (work up)		88.11	0.902	11.7602		20573.4	20.5734	22808.7	233.497				3650	200 L	1.78271	319902-200L	141-78-6		416.258
		rac-1		C6H10O3	Intermediate (external)	anti-Hexahydrofuro[2,3-b]furan-3-ol	130.14								2325.53	2.32553	17.8694
3B																							0.43		25	1	22
	rac-1		anti-Hexahydrofuro[2,3-b]furan-3-ol	C6H10O3	Intermediate (external)		130.14		1		2325.53	2.32553		17.8694
			Methyl tert-butyl ether (MTBE)	C5H12O	Solvent		88.15	0.74	84.0382	0.998	132376	132.376	178887	1501.72				4100	200 L	2.44199	MX0819-30	1634-04-4		3667.18
			Procine Pancrease Lipase (PPL)	C11H9N3NaO2+	Bio-catalyst		238.202		0.0546343	10% w/w	232.553	0.232553		0.976284				202	500 g	96.2336	L3126-500G	9001-62-1		93.9513
			Propionic anhydride (PrCO)2O	C6H10O3	Reagent		130.14	1.015	1	0.99	2325.53	2.32553	2291.16	17.8694				60.4	1 L	7.74429	8006801000	123-62-6		138.386
			Cyclohexane (c-hexane)	C6H12	Solvent (work up)		84.16	0.779	17.9918		27057.6	27.0576	34733.8	321.502				4120	200 L	2.22554	CX2290-30	110-82-7		715.517
			Ethyl Acetate (EtOAc)	C4H8O2	Solvent (work up)		88.11	0.902	11.7611		18517.6	18.5176	20529.5	210.165				3650	200 L	1.78271	319902-200L	141-78-6		374.664
		(-)-1	Bis-THF Alcohol	C6H10O3	Target Molecule	(3R,3aS,6aR)-Hexahydrofuro[2,3-b]furan-3-ol	130.143			0.99					1000	1	7.68386
																						Overall exp yield	0.35991	1649.76			66
Table 23B: Summation of chemical materials per category per synthesis step for the production of 1kg bis-THF alcohol
Step No.:	Material Category	Material Accumulated (kg)	Step Product (kg)
1B	Starting Material	4.14584
	Solvent	133.516
	Reagent	7.2659
	Water	0
	Intermediate (external)	-	5.20715
2B	Intermediate (external)	5.20715
	Solvent	197.707
	Reagent	0.0397493
	Water	0
	Intermediate (external)	-	2.32553
3B	Intermediate (external)	2.32553
	Solvent	177.951
	Reagent	2.32553
	Water	0
	Target molecule	-	1

## Sheet: Step-by-step E-factor
ROUTE B: E-Factor main synthesis step-by-step procedure
Table 24B: Simple, complete and traditional E-Factor calculations for route B synthesis to 1kg bis-THF alcohol
Step No.	Starting Material/ Intermediate (external) (kg)	Solvents (kg)	Reagents (kg)	Water (kg)	Product (kg)	Step sE-factor (kg/kg)	sE-Factor Contribution to Process (kg/kg)	Step cE-Factor (kg/kg)	cE-Factor Contribution to Process (kg/kg)	E-Factor Contribution to Process (kg/kg)	Process Mass Intensity (PMI) (kg/kg)	Process Complexity
1B	4.14584	133.516	7.2659	0	5.20715	1.19155	6.20458	26.8323	139.72	19.5561		1
2B	5.20715	197.707	0.0397493	0	2.32553	1.25622	2.92137	86.2723	200.629	22.6921		1
3B	2.32553	177.951	2.32553	0	1	3.65106	3.65106	181.603	181.603	21.4462		1
Total	4.14584	509.174	9.63118	0	1		12.777		521.951	63.6944	522.951	3
Table 25B: Total material mass per category for route B step-by-step procedure
Starting Material (kg)	Solvents (kg)	Reagents (kg)	Water (kg)
4.14584	509.174	9.63118	0

## Sheet: Step-by-step Cummulative E-fact
ROUTE B: Cummulative E-Factor step-by-step procedure and sub-synthesis advanced starting material (ASM)
Ste-by-step procedure route B E-Factors				Advanced Starting Material route B E-Factor
Table 26B: Summary of E-factor values calculated for main route B (starting from compound 2b)				Table 27B: Summary of E-factor values calculated for step-by-step advanced starting material route B
sEF (kg/kg)	cEF (kg/kg)	E-factor (kg/kg)		sEF (kg/kg)	cEF (kg/kg)	E-factor (kg/kg)
12.777	521.951	63.6944		43.5396	261.716	65.3572
		Table 28B: Green Score card input data
		sEF, cEF and E-Factor summary for route B sub and step-by-step synthesis
		sEF (kg/kg)	cEF (kg/kg)	E-factor (kg/kg)
		56.3166	783.667	129.052
		Complexity = Construction steps
		3
Table 29B: Total amount of material categories for route B step-by-step procedure and sub-synthesis
Starting Material (kg)	Solvents (kg)	Reagents (kg)	Water (kg)
33.3923	727.351	28.0703	0
